# Supplementary material for: Impact of One Year of Pandemic on Spanish Intensive Care Units
Source: Research Square preprint supplement (doi:10.21203/rs.3.rs-1316286/v1), 2022-02-07
Supplement: Supplementary file 1 [file 7209937e4b3be4377e592e16.docx]

**Distribution of responses by Autonomous Community**

| **Autonomous Community** | **Total responses** | **Hospitals** | | | |
| --- | --- | --- | --- | --- | --- |
| **Total** | **Hospital beds** | | |
| **<200** | **200-500** | **>500** |
| Total | 246 | 157 | 15 (9.6) | 80 (51.0) | 62 (39.5) |
| Andalusia | 30 (12.2) | 20 (12.7) | 1 (6.7) | 9 (11.3) | 10 (16.1) |
| Aragon | 11 (4.5) | 7 (4.5) | 3 (20.0) | 2 (2.5) | 2 (3.2) |
| Asturias | 8 (3.3) | 5 (3.2) | 0 (0) | 4 (5.0) | 1 (1.6) |
| Balearic Islands | 11 (4.5) | 6 (3.8) | 3 (20.0) | 2 (2.5) | 1 (1.6) |
| Canary Islands | 12 (4.9) | 7 (4.5) | 0 (0) | 2 (2.5) | 5 (8.1) |
| Cantabria | 2 (0.8) | 1 (0.6) | 0 (0) | 0 (0) | 1 (1.6) |
| Castilla La Mancha | 11 (4.5) | 6 (3.8) | 0 (0) | 3 (3.8) | 3 (4.8) |
| Castilla León | 13 (5.3) | 8 (5.1) | 0 (0) | 3 (3.8) | 5 (8.1) |
| Catalonia | 33 (13.4) | 21 (13.4) | 4 (26.7) | 11 (13.8) | 6 (9.7) |
| Valencia Community | 35 (14.2) | 26 (16.6) | 1 (6.7) | 20 (25.0) | 5 (8.1) |
| Extremadura | 3 (1.2) | 2 (1.3) | 0 (0) | 2 (2.5) | 0 (0) |
| Galicia | 19 (7.7) | 9 (5.7) | 1 (6.7) | 1 (1.3) | 7 (11.3) |
| La Rioja | 1 (0.4) | 1 (0.6) | 0 (0) | 1 (1.3) | 0 (0) |
| Madrid | 37 (15.0) | 23 (14.6) | 1 (6.7) | 13 (16.3) | 9 (14.5) |
| Murcia | 8 (3.3) | 6 (3.8) | 0 (0) | 4 (5.0) | 2 (3.2) |
| Navarra | 7 (2.8) | 3 (1.9) | 1 (6.7) | 0 (0) | 2 (3.2) |
| Basque Country | 7 (2.8) | 5 (3.2) | 0 (0) | 2 (2.5) | 3 (4.8) |
| Ceuta | 1 (0.4) | 1 (0.6) | 0 (0) | 1 (1.3) | 0 (0) |
